# Supplementary material for: Strain-induced 3D-oriented crystallites in natural rubber/chitin nanofiber composites
Source: Royal Society of Chemistry journal article supplement (doi:10.1039/d3sm00022b), 2023-01-01
Supplement: d3sm00022b1.pdf [file d3sm00022b1.pdf]

## Supporting Information

### Strain-induced 3D-Oriented Crystallites in Natural Rubber/Chitin Nanofiber Composites

Jinghua Wu<sup>a</sup>, Jin Yin<sup>a</sup>, Jian Hu<sup>a\*</sup>, Qiran Wang<sup>a</sup>, Hao Zhang<sup>a</sup>, Rui Xin<sup>a</sup>, Shaojuan Wang<sup>a</sup>,  
Shouke Yan<sup>a&b</sup>, Jianming Zhang<sup>a</sup>

<sup>a</sup> Key Laboratory of Rubber-Plastics, Ministry of Education/ Shandong Provincial Key Laboratory of Rubber-plastics, Qingdao University of Science & Technology, Qingdao City 266042, P. R. China;

<sup>b</sup> State Key Laboratory of Chemical Resource Engineering, College of Materials Science and Engineering, Beijing University of Chemical Technology, Beijing 100029, P. R. China.

**Characterization of Cross-linking density.** Cross-linking densities ( $\nu$ ) of the samples were calculated using the Florye–Rehner equation (1) according the swelling data. A certain amount of the NR/ChNFsX was cut off from the vulcanized rubber test pieces and immersed in the solution of toluene for 3 days at room temperature to remove the organic additives, and then dried at 30 °C in the blast drying oven for 1 days until the weight of specimen was stable.

$$\nu = - \frac{[\ln(1 - v_{rf}) + v_{rf} + \chi v_{rf}^2]}{v_s(v_{rf}^{1/3} - v_{rf}/2)} \quad (1)$$

where  $v_{rf}$  is the volume fraction of the cross-linked polymer, the interaction parameter ( $\chi$ ) is the interaction parameter between NR and toluene, which value is 0.413,<sup>1</sup>  $v_s$  is the molar volume of the swelling solvent which value is  $106.3 \text{ cm}^3/\text{mol}$ . The  $v_{rf}$  was obtained by equation (2)

$$v_{rf} = \frac{m_3}{\rho} \frac{m_2 - m_1}{\rho + \rho_s} \quad (2)$$

where  $m_1$  and  $m_2$  are the initial weight before equilibrium swelling and specimen weights at equilibrium swelling.  $m_3$  is the specimen weight after drying.  $\rho$  and  $\rho_s$  are the densities of toluene and unswollen rubber vulcanizate, respectively.  $\rho$  is  $0.866 \text{ g/cm}^3$ .

The soluble fraction was obtained by equation (3).<sup>2</sup>

$$S = \frac{m_1 - m_3}{m_3} \times 100\% \quad (3)$$

As shown in Table 1, the cross-linking density of NR/ChNFs composites increases with ChNFs contents increasing accordingly.

**Table S1.** The cross-linking densities of NR/ChNFs composites with different ChNFs contents.

| Sample     | Cross-linking density( $10^{-4}$ mol/cm <sup>3</sup> ) | soluble fraction (%) |
|------------|--------------------------------------------------------|----------------------|
| NR         | $0.9855 \pm 0.015$                                     | 3.061                |
| NR/ChNFs5  | $1.2262 \pm 0.011$                                     | 3.484                |
| NR/ChNFs10 | $1.8484 \pm 0.02$                                      | 4.000                |
| NR/ChNFs20 | $2.9507 \pm 0.017$                                     | 4.362                |
| NR/ChNFs30 | $3.5690 \pm 0.008$                                     | 7.954                |

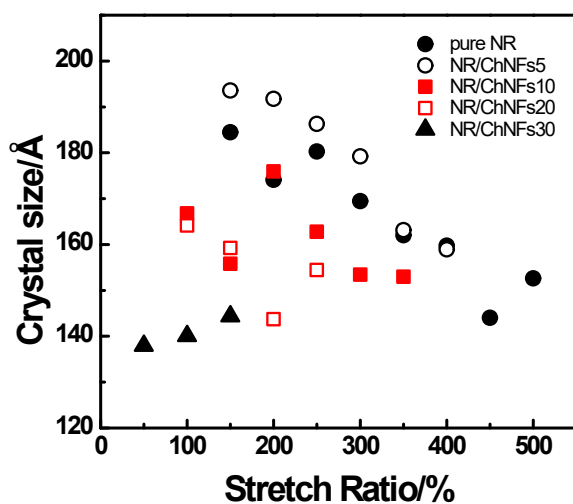

Figure S1. The crystallites size of NR/ChNFs composites under uniaxially-stretching process with different ChNFs contents.

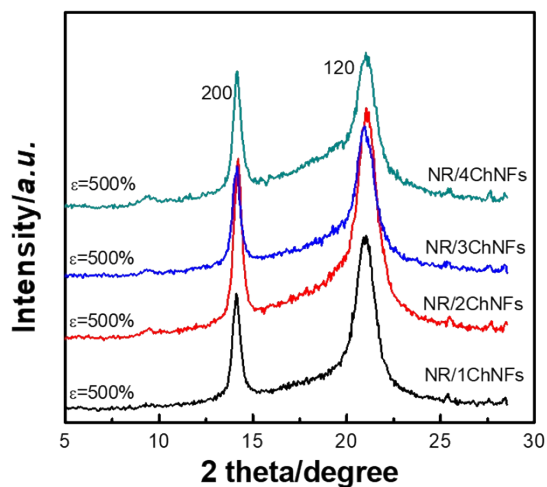

Figure S2. 1D-WAXD profiles along equatorial integration of NR/ChNFs composites after strain-induced crystallization at  $\epsilon = 500\%$ .

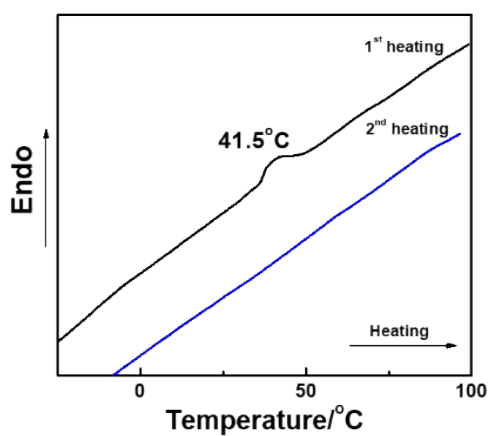

Figure S3. DSC curve of stretched NR/ChNFs30 composite film. Heating rate is 10 °C/min.

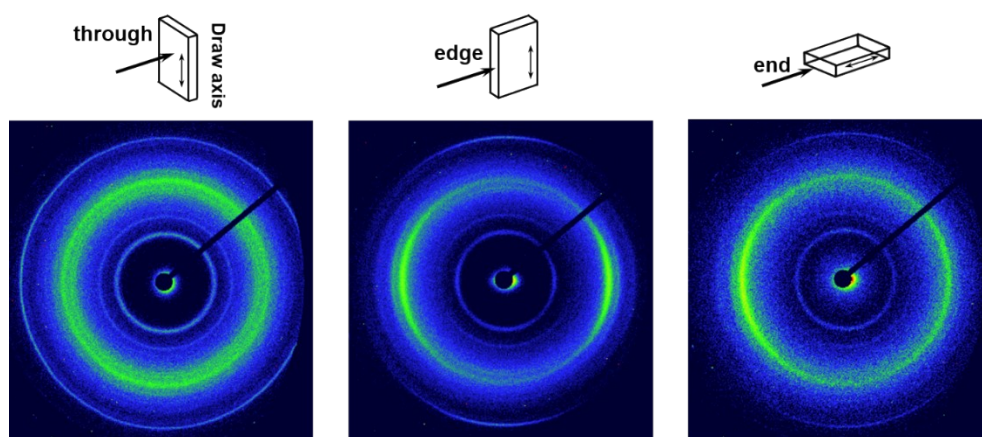

Figure S4. 2D-WAXD patterns of unstretched NR/ChNFs30 composite measured along the through, edge, and end directions.

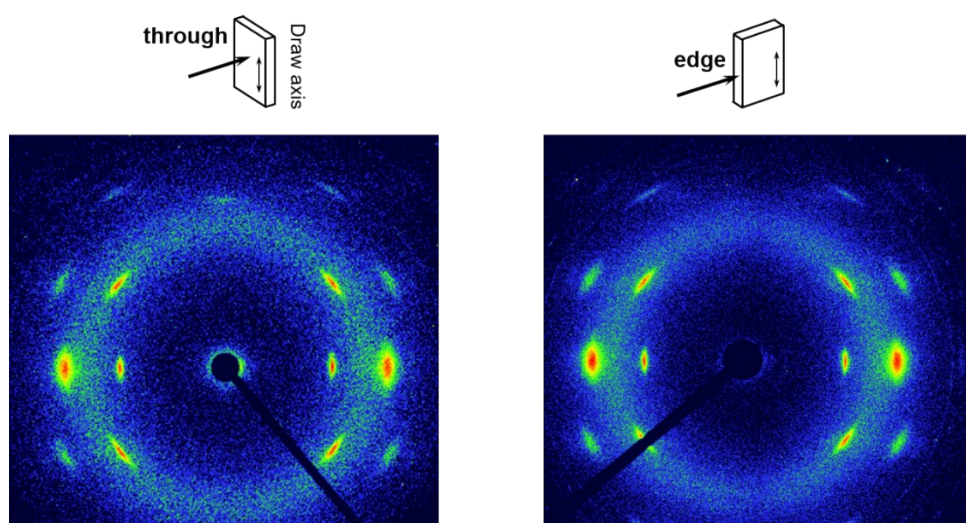

Figure S5. 2D-SAXS patterns of stretched NR composite measured along the through and edge directions.

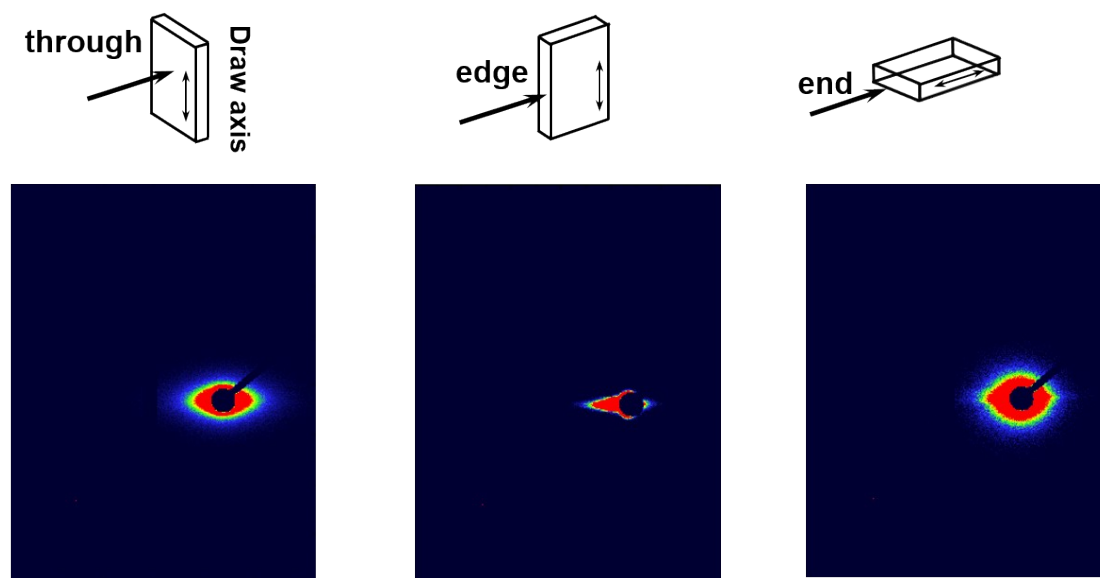

Figure S6. 2D-SAXS patterns of unstretched NR/ChNFs30 composite measured along the through, edge, and end directions. Comparing with 2D-WAXD measurement, the distance between the sample and the detector was moved to 2490 mm in 2D-SAXS measurement.

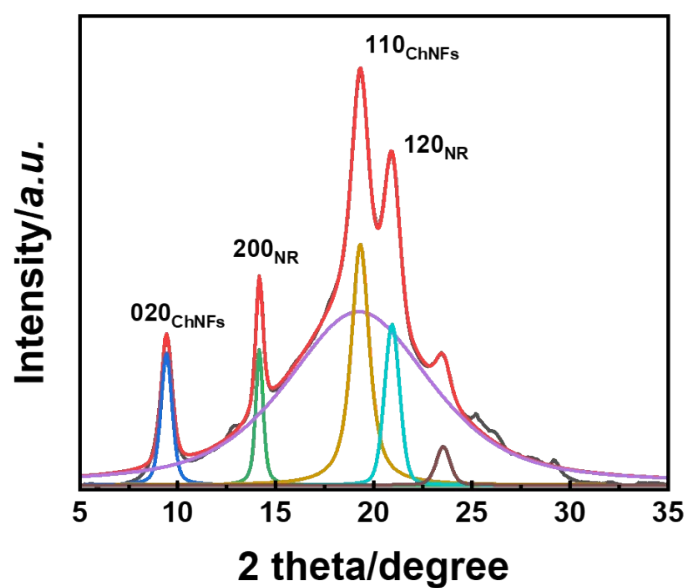

Figure S7. Multi-peak fitting of 1D-WAXD curves taken from 2D-WAXD end-pattern of NR/ChNFs30 composite.

## Notes and references

1. C. Ryu, J. K. Yang, W. Park, S. J. Kim, D. I. Kim, G. Seo, *J. Appl. Polym. Sci.*, 2020, **137**, 49548.
2. S. Seghar, L. Asaro, N. Aït Hocine, *J Polym Environ*, 2019, **27**, 2318.
